# Supplementary material
Source: PubMed Central journal article supplement (PMC7725984)
Supplement: NIHMS1625109-supplement-1.pdf [file NIHMS1625109-supplement-1.pdf]

## Supplemental Material

**Title:** Implications of the use of algorithmic diagnoses or Medicare claims to ascertain dementia

**Authors:** Melinda C. Power<sup>1</sup>, Kan Z. Gianattasio<sup>1</sup>, Adam Ciarleglio<sup>2</sup>

**Affiliations:** <sup>1</sup>Department of Epidemiology, Milken Institute School of Public Health, George Washington University, Washington, DC, <sup>2</sup>Department of Biostatistics and Bioinformatics, Milken Institute School of Public Health, George Washington University, Washington, DC

## Supplemental Methods

ICD-9-CM codes used to identify dementia in Medicare data (originally from Taylor et al. 2009 [1]):

- 331.0 Alzheimer's disease
- 331.1 Pick's disease
- 331.2 Senile degeneration of the brain
- 331.7 Cerebral degeneration in diseases classified elsewhere
- 290.0 Senile dementia, uncomplicated
- 290.1 Presenile dementia (brain syndrome w/presenile dementia)
- 290.10 Presenile dementia, uncomplicated
- 290.11 Presenile dementia, w/delirium
- 290.12 Presenile dementia, w/delusional features
- 290.13 Presenile dementia, w/depressive features
- 290.20 Senile dementia, w/delusional features
- 290.21 Senile dementia, w/depressive features
- 290.3 Senile dementia, w/delirium
- 290.40 Arteriosclerotic dementia, uncomplicated
- 290.41 Arteriosclerotic dementia, w/delirium
- 290.42 Arteriosclerotic dementia, w/ delusional features
- 290.43 Arteriosclerotic dementia, w/ depressive features
- 294.0 Amnestic syndrome (Korsakoff's psychosis or syndrome, nonalcoholic)
- 294.1 Dementia in conditions classified elsewhere
- 294.8 Other specified organ brain syndrome (chronic)
- 797 Senility without mention of psychosis

1. Taylor DH, Jr., Ostbye T, Langa KM, Weir D, Plassman BL. The accuracy of Medicare claims as an epidemiological tool: the case of dementia revisited. *J Alzheimers Dis.* 2009;17(4):807-15.

| <b>Supplemental Table 1. Performance metrics for each algorithm derived through comparison to Wave A dementia diagnoses in the common and Medicare samples</b> |                              |              |                 |             |           |                     |              |                      |                                            |
|----------------------------------------------------------------------------------------------------------------------------------------------------------------|------------------------------|--------------|-----------------|-------------|-----------|---------------------|--------------|----------------------|--------------------------------------------|
|                                                                                                                                                                | <b>Common Sample (n=608)</b> |              |                 |             |           |                     |              |                      | <b>Medicare Subsample, Any FFS (n=517)</b> |
|                                                                                                                                                                | <b>H-W</b>                   | <b>L-K-W</b> | <b>Crimmins</b> | <b>Hurd</b> | <b>Wu</b> | <b>Expert Model</b> | <b>LASSO</b> | <b>Modified Hurd</b> | <b>Medicare 3-year</b>                     |
| Overall                                                                                                                                                        |                              |              |                 |             |           |                     |              |                      |                                            |
| Sensitivity                                                                                                                                                    | 41%                          | 56%          | 64%             | 63%         | 63%       | 79%                 | 89%          | 80%                  | 47%                                        |
| Specificity                                                                                                                                                    | 100%                         | 97%          | 97%             | 99%         | 98%       | 92%                 | 91%          | 95%                  | 98%                                        |
| Accuracy                                                                                                                                                       | 93%                          | 92%          | 93%             | 94%         | 94%       | 90%                 | 91%          | 93%                  | 91%                                        |
| Under Age 80                                                                                                                                                   |                              |              |                 |             |           |                     |              |                      |                                            |
| Sensitivity                                                                                                                                                    | 47%                          | 57%          | 56%             | 49%         | 51%       | 62%                 | 84%          | 64%                  | 40%                                        |
| Specificity                                                                                                                                                    | 100%                         | 98%          | 99%             | 100%        | 99%       | 97%                 | 94%          | 98%                  | 99%                                        |
| Accuracy                                                                                                                                                       | 97%                          | 95%          | 96%             | 97%         | 96%       | 95%                 | 94%          | 96%                  | 96%                                        |
| Age 80 and over                                                                                                                                                |                              |              |                 |             |           |                     |              |                      |                                            |
| Sensitivity                                                                                                                                                    | 38%                          | 55%          | 68%             | 69%         | 69%       | 86%                 | 91%          | 87%                  | 50%                                        |
| Specificity                                                                                                                                                    | 100%                         | 95%          | 95%             | 96%         | 96%       | 81%                 | 84%          | 87%                  | 95%                                        |
| Accuracy                                                                                                                                                       | 86%                          | 86%          | 88%             | 90%         | 90%       | 82%                 | 85%          | 87%                  | 85%                                        |
| Non-Hispanic Black                                                                                                                                             |                              |              |                 |             |           |                     |              |                      |                                            |
| Sensitivity                                                                                                                                                    | 43%                          | 69%          | 73%             | 90%         | 63%       | 88%                 | 97%          | 90%                  | 38%                                        |
| Specificity                                                                                                                                                    | 98%                          | 84%          | 96%             | 96%         | 94%       | 91%                 | 87%          | 88%                  | 98%                                        |
| Accuracy                                                                                                                                                       | 87%                          | 81%          | 91%             | 95%         | 88%       | 90%                 | 89%          | 89%                  | 85%                                        |
| Non-Hispanic White                                                                                                                                             |                              |              |                 |             |           |                     |              |                      |                                            |
| Sensitivity                                                                                                                                                    | 41%                          | 54%          | 62%             | 59%         | 63%       | 77%                 | 87%          | 78%                  | 49%                                        |
| Specificity                                                                                                                                                    | 100%                         | 98%          | 98%             | 99%         | 99%       | 92%                 | 91%          | 95%                  | 98%                                        |
| Accuracy                                                                                                                                                       | 93%                          | 93%          | 94%             | 94%         | 95%       | 91%                 | 91%          | 93%                  | 92%                                        |
| Male                                                                                                                                                           |                              |              |                 |             |           |                     |              |                      |                                            |
| Sensitivity                                                                                                                                                    | 26%                          | 44%          | 54%             | 50%         | 42%       | 63%                 | 70%          | 69%                  | 39%                                        |
| Specificity                                                                                                                                                    | 100%                         | 95%          | 97%             | 98%         | 98%       | 93%                 | 92%          | 94%                  | 97%                                        |
| Accuracy                                                                                                                                                       | 92%                          | 90%          | 93%             | 93%         | 93%       | 90%                 | 90%          | 91%                  | 91%                                        |
| Female                                                                                                                                                         |                              |              |                 |             |           |                     |              |                      |                                            |
| Sensitivity                                                                                                                                                    | 49%                          | 61%          | 68%             | 69%         | 73%       | 87%                 | 98%          | 85%                  | 51%                                        |
| Specificity                                                                                                                                                    | 100%                         | 98%          | 98%             | 99%         | 98%       | 92%                 | 90%          | 95%                  | 98%                                        |
| Accuracy                                                                                                                                                       | 93%                          | 93%          | 94%             | 95%         | 95%       | 91%                 | 91%          | 94%                  | 92%                                        |
| < High School                                                                                                                                                  |                              |              |                 |             |           |                     |              |                      |                                            |
| Sensitivity                                                                                                                                                    | 35%                          | 57%          | 62%             | 67%         | 72%       | 79%                 | 89%          | 83%                  | 33%                                        |

|                    |      |     |      |      |      |     |      |      |      |
|--------------------|------|-----|------|------|------|-----|------|------|------|
| Specificity        | 99%  | 92% | 94%  | 97%  | 95%  | 87% | 86%  | 93%  | 99%  |
| Accuracy           | 88%  | 86% | 88%  | 92%  | 91%  | 86% | 86%  | 91%  | 85%  |
| High School +      |      |     |      |      |      |     |      |      |      |
| Sensitivity        | 46%  | 54% | 65%  | 60%  | 56%  | 78% | 89%  | 77%  | 60%  |
| Specificity        | 100% | 98% | 99%  | 99%  | 100% | 94% | 93%  | 96%  | 97%  |
| Accuracy           | 95%  | 94% | 96%  | 95%  | 95%  | 93% | 93%  | 94%  | 94%  |
| Diabetes           |      |     |      |      |      |     |      |      |      |
| Sensitivity        | 29%  | 42% | 53%  | 61%  | 68%  | 73% | 82%  | 82%  | 25%  |
| Specificity        | 100% | 95% | 97%  | 99%  | 99%  | 93% | 93%  | 95%  | 99%  |
| Accuracy           | 93%  | 89% | 92%  | 95%  | 96%  | 91% | 92%  | 94%  | 89%  |
| No Diabetes        |      |     |      |      |      |     |      |      |      |
| Sensitivity        | 44%  | 58% | 66%  | 63%  | 62%  | 80% | 90%  | 80%  | 52%  |
| Specificity        | 100% | 97% | 97%  | 98%  | 98%  | 92% | 91%  | 95%  | 97%  |
| Accuracy           | 93%  | 93% | 94%  | 94%  | 94%  | 90% | 91%  | 93%  | 92%  |
| 1+ IADL Limitation |      |     |      |      |      |     |      |      |      |
| Sensitivity        | 60%  | 74% | 83%  | 86%  | 85%  | 98% | 100% | 99%  | 54%  |
| Specificity        | 99%  | 88% | 84%  | 92%  | 93%  | 74% | 73%  | 82%  | 97%  |
| Accuracy           | 84%  | 82% | 84%  | 90%  | 90%  | 83% | 83%  | 88%  | 80%  |
| No IADL Limitation |      |     |      |      |      |     |      |      |      |
| Sensitivity        | 6%   | 21% | 27%  | 18%  | 20%  | 42% | 68%  | 44%  | 33%  |
| Specificity        | 100% | 98% | 100% | 100% | 99%  | 95% | 94%  | 97%  | 98%  |
| Accuracy           | 95%  | 94% | 96%  | 95%  | 95%  | 92% | 93%  | 94%  | 95%  |
| Self-respondent    |      |     |      |      |      |     |      |      |      |
| Sensitivity        | 14%  | 31% | 42%  | 32%  | 36%  | 62% | 79%  | 63%  | 34%  |
| Specificity        | 100% | 97% | 99%  | 99%  | 99%  | 93% | 93%  | 95%  | 98%  |
| Accuracy           | 94%  | 93% | 95%  | 94%  | 95%  | 91% | 92%  | 93%  | 93%  |
| Proxy respondent   |      |     |      |      |      |     |      |      |      |
| Sensitivity        | 73%  | 84% | 89%  | 98%  | 94%  | 98% | 100% | 100% | 63%  |
| Specificity        | 99%  | 75% | 49%  | 83%  | 76%  | 45% | 24%  | 72%  | 100% |
| Accuracy           | 81%  | 81% | 76%  | 93%  | 88%  | 81% | 75%  | 91%  | 76%  |

All estimates are weighted using Wave A ADAMS sampling weights.

| <b>Supplemental Table 2. Dementia prevalence by ascertainment strategy and participant characteristics</b> |                             |                            |                      |                      |                      |                      |                                                                                                  |                      |                      |                                            |
|------------------------------------------------------------------------------------------------------------|-----------------------------|----------------------------|----------------------|----------------------|----------------------|----------------------|--------------------------------------------------------------------------------------------------|----------------------|----------------------|--------------------------------------------|
|                                                                                                            | <b>Common Sample, n=608</b> |                            |                      |                      |                      |                      |                                                                                                  |                      |                      | <b>Medicare Subsample, Any FFS (n=517)</b> |
|                                                                                                            | <b>In-Person Evaluation</b> | <b>Existing Algorithms</b> |                      |                      |                      |                      | <b>Algorithms Designed to Minimize Race/Ethnicity Differences in Sensitivity and Specificity</b> |                      |                      | <b>Medicare</b>                            |
|                                                                                                            | <b>ADAMS</b>                | <b>H-W</b>                 | <b>L-K-W</b>         | <b>Crimmins</b>      | <b>Hurd</b>          | <b>Wu</b>            | <b>Expert Model</b>                                                                              | <b>LASSO</b>         | <b>Modified Hurd</b> | <b>Medicare 3-year</b>                     |
| <b>Dementia Prevalence (95% Confidence Interval)</b>                                                       |                             |                            |                      |                      |                      |                      |                                                                                                  |                      |                      |                                            |
| Overall                                                                                                    | 11.8% (9.5%, 14.5%)         | 5.0% (3.8%, 6.6%)          | 9.4% (7.7%, 11.5%)   | 9.8% (8.0%, 12.0%)   | 8.7% (6.9%, 10.9%)   | 8.9% (7.1%, 11.1%)   | 16.3% (13.5%, 19.4%)                                                                             | 18.3% (15.2%, 21.8%) | 14.1% (11.7%, 16.9%) | 7.9% (6.0%, 10.3%)                         |
| Age                                                                                                        |                             |                            |                      |                      |                      |                      |                                                                                                  |                      |                      |                                            |
| Under Age 80 (ref)                                                                                         | 5.7% (3.6%, 9.0%)           | 2.8% (1.5%, 5.1%)          | 5.5% (3.8%, 8.0%)    | 4.5% (2.9%, 7.0%)    | 3.2% (1.8%, 5.5%)    | 3.7% (2.2%, 6.1%)    | 6.3% (4.3%, 9.2%)                                                                                | 10.0% (7.1%, 14.0%)  | 5.4% (3.6%, 7.9%)    | 3.3% (1.8%, 5.7%)                          |
| Age 80 and over                                                                                            | 22.9% (18.2%, 28.4%)        | 9.1% (7.0%, 11.9%)         | 16.6% (13.2%, 20.7%) | 19.6% (15.6%, 24.2%) | 18.9% (14.8%, 23.8%) | 18.5% (14.5%, 23.3%) | 34.6% (28.3%, 41.5%)                                                                             | 33.6% (27.4%, 40.3%) | 30.1% (24.5%, 36.4%) | 15.6% (11.5%, 20.8%)                       |
| PR (95%CI)                                                                                                 | 3.99 (2.41, 6.60)           | 3.26 (1.68, 6.31)          | 3.00 (1.94, 4.63)    | 4.35 (2.64, 7.16)    | 5.91 (3.26, 10.71)   | 4.99 (2.87, 8.68)    | 5.46 (3.60, 8.30)                                                                                | 3.35 (2.27, 4.97)    | 5.61 (3.64, 8.66)    | 4.81 (2.52, 9.17)                          |
| Gender                                                                                                     |                             |                            |                      |                      |                      |                      |                                                                                                  |                      |                      |                                            |
| Male (ref)                                                                                                 | 9.9% (7.0%, 13.8%)          | 2.9% (1.8%, 4.6%)          | 8.5% (6.2%, 11.6%)   | 8.4% (6.0%, 11.6%)   | 6.8% (4.8%, 9.5%)    | 5.5% (3.9%, 7.8%)    | 12.8% (9.5%, 16.8%)                                                                              | 13.8% (10.1%, 18.6%) | 12.3% (9.3%, 16.2%)  | 6.5% (3.8%, 10.9%)                         |
| Female                                                                                                     | 13.0% (9.8%, 17.0%)         | 6.4% (4.6%, 8.9%)          | 10.0% (7.7%, 12.9%)  | 10.7% (8.2%, 13.9%)  | 10.0% (7.5%, 13.3%)  | 11.1% (8.4%, 14.5%)  | 18.5% (14.6%, 23.2%)                                                                             | 21.2% (16.9%, 26.3%) | 15.2% (11.9%, 19.2%) | 8.8% (6.4%, 12.0%)                         |
| PR (95% CI)                                                                                                | 1.31 (0.85, 2.03)           | 2.22 (1.25, 3.92)          | 1.18 (0.78, 1.76)    | 1.29 (0.85, 1.96)    | 1.48 (0.94, 2.32)    | 2.00 (1.29, 3.11)    | 1.45 (1.01, 2.10)                                                                                | 1.54 (1.05, 2.25)    | 1.23 (0.85, 1.78)    | 1.35 (0.73, 2.50)                          |
| Education                                                                                                  |                             |                            |                      |                      |                      |                      |                                                                                                  |                      |                      |                                            |
| HS or greater (ref)                                                                                        | 9.4% (7.0%, 12.4%)          | 4.3% (2.9%, 6.4%)          | 6.5% (4.8%, 8.9%)    | 7.3% (5.4%, 9.8%)    | 6.4% (4.7%, 8.8%)    | 5.7% (4.1%, 7.8%)    | 12.8% (9.9%, 16.3%)                                                                              | 14.4% (11.1%, 18.5%) | 11.3% (8.7%, 14.5%)  | 8.0% (5.6%, 11.2%)                         |
| <HS                                                                                                        | 17.5% (12.7%, 23.5%)        | 6.7% (4.7%, 9.5%)          | 16.2% (12.5%, 20.9%) | 15.7% (11.8%, 20.7%) | 14.1% (10.1%, 19.2%) | 16.5% (12.1%, 22.1%) | 24.5% (18.6%, 31.4%)                                                                             | 27.4% (21.2%, 34.6%) | 20.6% (15.6%, 26.6%) | 7.7% (5.1%, 11.5%)                         |

|                     |                      |                       |                      |                      |                      |                      |                      |                      |                      |                      |
|---------------------|----------------------|-----------------------|----------------------|----------------------|----------------------|----------------------|----------------------|----------------------|----------------------|----------------------|
| PR (95% CI)         | 1.87 (1.22, 2.85)    | 1.55 (0.91, 2.63)     | 2.48 (1.66, 3.73)    | 2.16 (1.44, 3.25)    | 2.19 (1.40, 3.42)    | 2.92 (1.87, 4.54)    | 1.91 (1.34, 2.74)    | 1.90 (1.34, 2.71)    | 1.82 (1.26, 2.63)    | 0.97 (0.57, 1.64)    |
| Race                |                      |                       |                      |                      |                      |                      |                      |                      |                      |                      |
| White (ref)         | 11.1% (8.8%, 14.0%)  | 4.61% (3.4%, 6.3%)    | 8.0% (6.3%, 10.1%)   | 9.2% (7.3%, 11.5%)   | 7.7% (5.9%, 10.0%)   | 8.2% (6.4%, 10.5%)   | 15.5% (12.7%, 18.9%) | 17.3% (14.2%, 21.0%) | 13.0% (10.5%, 15.9%) | 7.8% (5.8%, 10.4%)   |
| Black               | 19.3% (12.8%, 28.1%) | 9.9% (6.3%, 15.3%)    | 26.4% (18.2%, 36.6%) | 17.4% (11.5%, 25.6%) | 20.6% (13.9%, 29.5%) | 17.0% (11.5%, 24.5%) | 24.6% (16.8%, 34.6%) | 29.4% (20.5%, 40.3%) | 26.9% (18.6%, 37.2%) | 9.7% (5.7%, 15.8%)   |
| PR (95% CI)         | 1.74 (1.10, 2.74)    | 2.15 (1.25, 3.71)     | 3.31 (2.18, 5.03)    | 1.90 (1.20, 3.02)    | 2.68 (1.70, 4.23)    | 2.07 (1.32, 3.26)    | 1.59 (1.05, 2.39)    | 1.70 (1.15, 2.51)    | 2.08 (1.39, 3.10)    | 1.24 (0.70, 2.23)    |
| Diabetes            |                      |                       |                      |                      |                      |                      |                      |                      |                      |                      |
| No (ref)            | 12.0% (9.6%, 15.0%)  | 5.5% (4.0%, 7.4%)     | 9.5% (7.5%, 11.8%)   | 10.2% (8.1%, 12.7%)  | 9.0% (7.1%, 11.3%)   | 9.0% (7.2%, 11.4%)   | 16.8% (13.7%, 20.3%) | 19.0% (15.6%, 23.0%) | 14.3% (11.7%, 17.4%) | 8.7% (6.5%, 11.6%)   |
| Yes                 | 10.5% (5.5%, 19.2%)  | 3.1% (1.7%, 5.4%)     | 9.2% (6.0%, 13.9%)   | 8.1% (5.0%, 13.0%)   | 7.4% (3.5%, 14.9%)   | 8.2% (4.2%, 15.7%)   | 14.0% (8.5%, 22.1%)  | 14.9% (9.4%, 23.0%)  | 13.1% (8.00%, 20.8%) | 3.9% (2.1%, 7.1%)    |
| PR (95% CI)         | 0.87 (0.45, 1.70)    | 0.56 (0.30, 1.06)     | 0.98 (0.61, 1.56)    | 0.80 (0.47, 1.35)    | 0.82 (0.39, 1.75)    | 0.91 (0.45, 1.84)    | 0.83 (0.50, 1.39)    | 0.78 (0.48, 1.27)    | 0.92 (0.55, 1.54)    | 0.44 (0.22, 0.87)    |
| Any IADL Limitation |                      |                       |                      |                      |                      |                      |                      |                      |                      |                      |
| No (ref)            | 5.0% (3.3%, 7.4%)    | 0.3% (0.2%, 0.6%)     | 2.7% (1.9%, 3.9%)    | 1.8% (1.1%, 2.8%)    | 1.4% (0.9%, 2.0%)    | 1.7% (1.2%, 2.5%)    | 6.9% (5.0%, 9.4%)    | 9.0% (6.5%, 12.3%)   | 5.2% (3.8%, 7.2%)    | 3.7% (2.0%, 6.5%)    |
| Yes                 | 38.6% (30.0%, 47.9%) | 23.7% (17.5%, 31.1%)  | 35.9% (28.0%, 44.7%) | 41.5% (32.6%, 50.9%) | 37.9% (29.4%, 47.1%) | 37.2% (28.8%, 46.5%) | 53.4% (42.9%, 63.6%) | 55.1% (44.3%, 65.4%) | 49.1% (39.1%, 59.2%) | 22.7% (16.9%, 29.9%) |
| PR (95% CI)         | 7.72 (4.87, 12.24)   | 73.37 (36.93, 145.79) | 13.16 (8.67, 19.99)  | 23.04 (13.90, 38.19) | 27.94 (17.5, 44.6)   | 21.38 (13.76, 33.23) | 7.76 (5.37, 11.21)   | 6.13 (4.22, 8.89)    | 9.42 (6.44, 13.76)   | 6.23 (3.27, 11.86)   |

Abbreviations: CI, Confidence Interval; PR, Prevalence Ratio

All estimates are weighted using Wave A ADAMS sampling weights.

\*Medicare estimates derived from Medicare-FFS user subset of the common sample (n=517), while all other estimates are derived from the common sample (n=608)

| <b>Supplemental Table 3. Adjusted associations between participant characteristics and dementia status by dementia classification strategy</b>                                                                                                                                                                              |                                            |                            |                   |                    |                    |                    |                                                                                                  |                   |                      |                                            |
|-----------------------------------------------------------------------------------------------------------------------------------------------------------------------------------------------------------------------------------------------------------------------------------------------------------------------------|--------------------------------------------|----------------------------|-------------------|--------------------|--------------------|--------------------|--------------------------------------------------------------------------------------------------|-------------------|----------------------|--------------------------------------------|
|                                                                                                                                                                                                                                                                                                                             | <b>Common Sample (n=608)</b>               |                            |                   |                    |                    |                    |                                                                                                  |                   |                      | <b>Medicare Subsample, Any FFS (n=517)</b> |
|                                                                                                                                                                                                                                                                                                                             | <b>In-Person Evaluation</b>                | <b>Existing Algorithms</b> |                   |                    |                    |                    | <b>Algorithms Designed to Minimize Race/Ethnicity Differences in Sensitivity and Specificity</b> |                   |                      | <b>Medicare, Any FFS</b>                   |
|                                                                                                                                                                                                                                                                                                                             | <b>ADAMS</b>                               | <b>H-W</b>                 | <b>L-K-W</b>      | <b>Crimmins</b>    | <b>Hurd</b>        | <b>Wu</b>          | <b>Expert Model</b>                                                                              | <b>LASSO</b>      | <b>Modified Hurd</b> | <b>Medicare 3-year</b>                     |
|                                                                                                                                                                                                                                                                                                                             | Prevalence Ratio (95% Confidence Interval) |                            |                   |                    |                    |                    |                                                                                                  |                   |                      |                                            |
| Age (per 10 years)                                                                                                                                                                                                                                                                                                          | 1.85 (1.38, 2.48)                          | 1.01 (0.82, 1.25)          | 1.37 (1.06, 1.76) | 1.55 (1.21, 1.98)  | 1.56 (1.19, 2.05)  | 1.56 (1.21, 2.01)  | 2.18 (1.68, 2.82)                                                                                | 1.87 (1.45, 2.39) | 2.11 (1.57, 2.84)    | 2.10 (1.41, 3.14)                          |
| Female                                                                                                                                                                                                                                                                                                                      | 1.11 (0.73, 1.69)                          | 1.75 (1.03, 2.99)          | 0.99 (0.71, 1.39) | 1.02 (0.74, 1.41)  | 1.19 (0.84, 1.69)  | 1.72 (1.17, 2.53)  | 1.20 (0.89, 1.61)                                                                                | 1.33 (0.97, 1.82) | 0.98 (0.71, 1.35)    | 1.17 (0.61, 2.22)                          |
| Less than HS                                                                                                                                                                                                                                                                                                                | 0.96 (0.67, 1.39)                          | 0.66 (0.45, 0.98)          | 1.07 (0.76, 1.49) | 0.92 (0.67, 1.27)  | 0.88 (0.65, 1.19)  | 1.34 (1.00, 1.79)  | 1.00 (0.75, 1.32)                                                                                | 1.07 (0.80, 1.42) | 0.85 (0.63, 1.15)    | 0.49 (0.29, 0.81)                          |
| Black                                                                                                                                                                                                                                                                                                                       | 1.45 (0.99, 2.11)                          | 1.96 (1.31, 2.93)          | 2.57 (1.79, 3.69) | 1.53 (1.09, 2.16)  | 2.20 (1.57, 3.09)  | 1.55 (1.14, 2.11)  | 1.33 (0.98, 1.80)                                                                                | 1.42 (1.07, 1.89) | 1.77 (1.33, 2.37)    | 1.35 (0.81, 2.26)                          |
| Diabetes                                                                                                                                                                                                                                                                                                                    | 0.99 (0.60, 1.64)                          | 0.57 (0.29, 1.12)          | 0.97 (0.58, 1.61) | 0.90 (0.51, 1.61)  | 0.90 (0.62, 1.31)  | 0.90 (0.66, 1.24)  | 0.99 (0.69, 1.42)                                                                                | 0.86 (0.61, 1.21) | 1.09 (0.75, 1.60)    | 0.54 (0.27, 1.05)                          |
| Any IADL Limitation                                                                                                                                                                                                                                                                                                         | 3.09 (1.81, 5.27)                          | 19.90 (8.20, 48.28)        | 5.30 (3.25, 8.66) | 8.62 (4.63, 16.08) | 9.39 (5.33, 16.54) | 6.13 (3.52, 10.67) | 3.39 (2.18, 5.26)                                                                                | 2.54 (1.56, 4.16) | 4.47 (2.81, 7.11)    | 2.59 (1.19, 5.61)                          |
| Abbreviations: CI, Confidence Interval; FFS, fee-for-service; HS, high school; IADL, instrumental activities of daily living<br>All estimates are weighted using Wave A ADAMS sampling weights, and mutually adjusted for all other characteristics listed in the table as well as HRS proxy versus self-respondent status. |                                            |                            |                   |                    |                    |                    |                                                                                                  |                   |                      |                                            |

| <b>Supplemental Table 4. Sensitivity analysis for dementia prevalence by ascertainment strategy and participant characteristics using all available data</b> |                                                      |                            |                         |                         |                         |                         |                                                                                                  |                         |                            |                              |
|--------------------------------------------------------------------------------------------------------------------------------------------------------------|------------------------------------------------------|----------------------------|-------------------------|-------------------------|-------------------------|-------------------------|--------------------------------------------------------------------------------------------------|-------------------------|----------------------------|------------------------------|
|                                                                                                                                                              | <b>In-Person Evaluation</b>                          | <b>Existing Algorithms</b> |                         |                         |                         |                         | <b>Algorithms Designed to Minimize Race/Ethnicity Differences in Sensitivity and Specificity</b> |                         |                            | <b>Medicare, Any FFS</b>     |
|                                                                                                                                                              | <b>ADAMS N=751</b>                                   | <b>H-W N=751</b>           | <b>L-K-W N=750</b>      | <b>Crimmins N=717</b>   | <b>Hurd N=724</b>       | <b>Wu N=750</b>         | <b>Expert Model N=745</b>                                                                        | <b>LASSO N=655</b>      | <b>Modified Hurd N=720</b> | <b>Medicare 3-year N=640</b> |
|                                                                                                                                                              | <b>Dementia Prevalence (95% Confidence Interval)</b> |                            |                         |                         |                         |                         |                                                                                                  |                         |                            |                              |
| Overall                                                                                                                                                      | 13.2%<br>(10.9%, 15.8%)                              | 5.4%<br>(4.2%, 6.8%)       | 10.2%<br>(8.6%, 12.2%)  | 12.0%<br>(9.9%, 14.4%)  | 9.6% (7.8%, 11.8%)      | 9.8% (8.1%, 11.8%)      | 18.0%<br>(15.3%, 21.1%)                                                                          | 19.2%<br>(16.1%, 22.7%) | 15.6%<br>(13.2%, 18.4%)    | 9.5%, (7.4%, 12.0%)          |
| Age                                                                                                                                                          |                                                      |                            |                         |                         |                         |                         |                                                                                                  |                         |                            |                              |
| Under Age 80 (ref)                                                                                                                                           | 6.2% (4.2%, 9.1%)                                    | 3.0% (1.8%, 5.1%)          | 6.0% (4.3%, 8.3%)       | 5.5% (3.6%, 8.2%)       | 3.4% (2.0%, 5.5%)       | 4.1% (2.7%, 6.3%)       | 7.5% (5.3%, 10.5%)                                                                               | 10.8%<br>(7.8%, 14.9%)  | 5.7% (4.0%, 8.0%)          | 4.2%, (2.6%, 6.8%)           |
| Age 80 and over                                                                                                                                              | 25.2%<br>(20.6%, 30.4%)                              | 9.5% (7.6%, 12.0%)         | 17.6%<br>(14.4%, 21.3%) | 23.0%<br>(18.8%, 27.9%) | 20.4%<br>(16.4%, 25.2%) | 19.7%<br>(16.0%, 23.9%) | 36.2%<br>(30.4%, 42.4%)                                                                          | 34.6%<br>(28.6%, 41.2%) | 33.5%<br>(27.9%, 39.5%)    | 17.6%,<br>(13.4%, 22.6%)     |
| PR (95%CI)                                                                                                                                                   | 4.07 (2.64, 6.27)                                    | 3.19 (1.79, 5.69)          | 2.93 (2.00, 4.29)       | 4.20 (2.67, 6.61)       | 6.08 (3.54, 10.44)      | 4.77 (2.98, 7.65)       | 4.84 (3.31, 7.09)                                                                                | 3.20 (2.21, 4.65)       | 5.92 (4.01, 8.75)          | 4.14 (2.40, 7.13)            |
| Gender                                                                                                                                                       |                                                      |                            |                         |                         |                         |                         |                                                                                                  |                         |                            |                              |
| Male (ref)                                                                                                                                                   | 10.3%<br>(7.6%, 13.8%)                               | 3.8% (2.5%, 5.6%)          | 9.1% (6.9%, 11.9%)      | 10.8%<br>(7.8%, 14.6%)  | 7.4% (5.4%, 10.1%)      | 6.7% (4.9%, 9.0%)       | 14.6%<br>(11.2%, 18.8%)                                                                          | 15.3%<br>(11.4%, 20.3%) | 13.5%<br>(10.4%, 17.3%)    | 7.5%, (4.8%, 11.5%)          |
| Female                                                                                                                                                       | 15.1%<br>(11.9%, 18.9%)                              | 6.5% (4.8%, 8.7%)          | 11.0%<br>(8.8%, 13.8%)  | 12.7%<br>(10.0%, 16.1%) | 11.0%<br>(8.4%, 14.3%)  | 11.9%<br>(9.4%, 15.0%)  | 20.3%<br>(16.4%, 24.8%)                                                                          | 21.8%<br>(17.5%, 26.8%) | 17.1%<br>(13.7%, 21.1%)    | 10.7%,<br>(8.0%, 14.2%)      |
| PR (95% CI)                                                                                                                                                  | 1.46 (1.00, 2.13)                                    | 1.72 (1.05, 2.81)          | 1.22 (0.85, 1.74)       | 1.18 (0.80, 1.75)       | 1.50 (0.99, 2.26)       | 1.77 (1.21, 2.60)       | 1.39 (1.00, 1.93)                                                                                | 1.43 (1.00, 2.04)       | 1.26 (0.91, 1.76)          | 1.43 (0.85, 2.40)            |
| Education                                                                                                                                                    |                                                      |                            |                         |                         |                         |                         |                                                                                                  |                         |                            |                              |
| HS or greater (ref)                                                                                                                                          | 10.5%<br>(8.0%, 13.5%)                               | 4.2% (2.9%, 5.9%)          | 6.7% (5.0%, 8.8%)       | 9.0% (6.8%, 11.9%)      | 7.6% (5.7%, 10.2%)      | 6.1% (4.6%, 8.1%)       | 14.4%<br>(11.5%, 18.0%)                                                                          | 15.3%<br>(11.9%, 19.5%) | 13.0%<br>(10.3%, 16.3%)    | 9.1%, (6.6%, 12.4%)          |
| <HS                                                                                                                                                          | 19.4%<br>(14.9%, 24.8%)                              | 8.2% (6.0%, 11.1%)         | 18.4%<br>(14.7%, 22.9%) | 18.8%<br>(14.6%, 23.9%) | 14.2%<br>(10.5%, 18.8%) | 18.3%<br>(14.2%, 23.3%) | 26.1%<br>(20.6%, 32.4%)                                                                          | 28.3%<br>(22.2%, 35.2%) | 21.7%<br>(17.0%, 27.2%)    | 10.2%,<br>(7.2%, 14.3%)      |
| PR (95% CI)                                                                                                                                                  | 1.86 (1.29, 2.67)                                    | 1.98 (1.24, 3.17)          | 2.77 (1.93, 3.97)       | 2.09 (1.44, 3.03)       | 1.85 (1.23, 2.79)       | 3.02 (2.07, 4.41)       | 1.81 (1.32, 2.49)                                                                                | 1.85 (1.32, 2.58)       | 1.66 (1.20, 2.31)          | 1.12 (0.71, 1.78)            |
| Race                                                                                                                                                         |                                                      |                            |                         |                         |                         |                         |                                                                                                  |                         |                            |                              |
| White (ref)                                                                                                                                                  | 12.4%<br>(10.0%, 15.1%)                              | 4.7% (3.5%, 6.1%)          | 8.5% (6.9%, 10.4%)      | 10.8%<br>(8.8%, 13.3%)  | 8.5% (6.7%, 10.8%)      | 8.9% (7.1%, 11.0%)      | 17.1%<br>(14.3%, 20.4%)                                                                          | 18.3%<br>(15.0%, 22.0%) | 14.5%<br>(12.0%, 17.4%)    | 9.2%, (7.1%, 11.9%)          |

|                     |                            |                             |                            |                            |                            |                            |                            |                            |                            |                             |
|---------------------|----------------------------|-----------------------------|----------------------------|----------------------------|----------------------------|----------------------------|----------------------------|----------------------------|----------------------------|-----------------------------|
| Black               | 22.2%<br>(15.4%,<br>30.9%) | 13.6% (8.8%,<br>20.5%)      | 29.6%<br>(21.4%,<br>39.4%) | 25.2%<br>(17.0%,<br>35.5%) | 21.6%<br>(14.9%,<br>30.1%) | 20.2%<br>(14.1%,<br>28.2%) | 27.4%<br>(19.6%,<br>36.9%) | 29.6%<br>(21.1%,<br>39.9%) | 27.9%<br>(19.9%,<br>37.5%) | 12.4%,<br>(7.3%,<br>20.1%)  |
| PR (95% CI)         | 1.79 (1.20,<br>2.68)       | 2.92 (1.76,<br>4.84)        | 3.49 (2.41,<br>5.04)       | 2.32 (1.52,<br>3.54)       | 2.53 (1.65,<br>3.87)       | 2.28 (1.52,<br>3.43)       | 1.60 (1.11,<br>2.30)       | 1.62 (1.12,<br>2.35)       | 1.92 (1.33,<br>2.77)       | 1.34 (0.76,<br>2.37)        |
| Diabetes            |                            |                             |                            |                            |                            |                            |                            |                            |                            |                             |
| No (ref)            | 13.6%<br>(11.1%,<br>16.4%) | 6.0% (4.7%,<br>7.8%)        | 10.3%<br>(8.4%,<br>12.5%)  | 12.6%<br>(10.2%,<br>15.4%) | 10.2%<br>(8.2%,<br>12.6%)  | 10.3%<br>(8.5%,<br>12.5%)  | 18.9%<br>(15.8%,<br>22.5%) | 20.3%<br>(16.8%,<br>24.3%) | 16.4%<br>(13.7%,<br>19.5%) | 10.6%,<br>(8.2%,<br>13.6%)  |
| Yes                 | 11.6%<br>(6.8%,<br>19.1%)  | 2.7% (1.5%,<br>4.6%)        | 10.1%<br>(6.8%,<br>14.9%)  | 9.3% (5.9%,<br>14.5%)      | 7.3% (3.7%,<br>13.9%)      | 7.6% (4.1%,<br>13.8%)      | 13.9%<br>(8.9%, 21%)       | 14.5%<br>(9.2%,<br>22.1%)  | 12.5%<br>(7.9%,<br>19.2%)  | 4.2%, (2.4%,<br>7.3%)       |
| PR (95% CI)         | 0.85 (0.49,<br>1.48)       | 0.44 (0.24,<br>0.80)        | 0.99 (0.64,<br>1.53)       | 0.74 (0.45,<br>1.22)       | 0.72 (0.36,<br>1.44)       | 0.74 (0.39,<br>1.40)       | 0.73 (0.46,<br>1.17)       | 0.72 (0.45,<br>1.15)       | 0.76 (0.47,<br>1.23)       | 0.40 (0.22,<br>0.73)        |
| Any IADL Limitation |                            |                             |                            |                            |                            |                            |                            |                            |                            |                             |
| No (ref)            | 5.2% (3.6%,<br>7.3%)       | 0.4% (0.2%,<br>0.7%)        | 2.8% (2.1%,<br>3.9%)       | 2.7% (1.6%,<br>4.4%)       | 1.8% (1.2%,<br>2.6%)       | 2.1% (1.5%,<br>2.9%)       | 8.3% (6.3%,<br>11.0%)      | 9.5% (7.0%,<br>12.9%)      | 6.4% (4.8%,<br>8.5%)       | 4.1%, (2.5%,<br>6.6%)       |
| Yes                 | 42.1%<br>(34.1%,<br>50.4%) | 23.4%<br>(18.0%,<br>29.7%)  | 37.0%<br>(29.9%,<br>44.7%) | 46.5%<br>(37.9%,<br>55.3%) | 38.1%<br>(30.4%,<br>46.5%) | 37.9%<br>(30.5%,<br>45.9%) | 53.0%<br>(43.9%,<br>62.0%) | 55.3%<br>(45.1%,<br>65.1%) | 49.5%<br>(40.5%,<br>58.5%) | 26.2%,<br>(20.1%,<br>33.4%) |
| PR (95% CI)         | 8.15 (5.45,<br>12.2)       | 57.93<br>(31.13,<br>107.82) | 13.05 (9.02,<br>18.88)     | 17.34<br>(10.27,<br>29.26) | 21.19<br>(13.75,<br>32.67) | 18.23<br>(12.33,<br>26.95) | 6.37 (4.58,<br>8.84)       | 5.81 (4.07,<br>8.29)       | 7.70 (5.50,<br>10.77)      | 6.42 (3.72,<br>11.11)       |

Abbreviations: CI, Confidence Interval; PR, Prevalence Ratio  
All estimates are weighted using Wave A ADAMS sampling weights.



| <b>Supplemental Table 5. Sensitivity analyses for adjusted associations between participant characteristics and dementia status by ascertainment using all available data</b> |                                            |                            |                    |                       |                    |                    |                                                                                                  |                    |                            |                              |
|-------------------------------------------------------------------------------------------------------------------------------------------------------------------------------|--------------------------------------------|----------------------------|--------------------|-----------------------|--------------------|--------------------|--------------------------------------------------------------------------------------------------|--------------------|----------------------------|------------------------------|
|                                                                                                                                                                               | <b>In-Person Evaluation</b>                | <b>Existing Algorithms</b> |                    |                       |                    |                    | <b>Algorithms Designed to Minimize Race/Ethnicity Differences in Sensitivity and Specificity</b> |                    |                            | <b>Medicare, Any FFS</b>     |
|                                                                                                                                                                               | <b>ADAMS N=751</b>                         | <b>H-W N=751</b>           | <b>L-K-W N=750</b> | <b>Crimmins N=717</b> | <b>Hurd N=724</b>  | <b>Wu N=750</b>    | <b>Expert Model N=745</b>                                                                        | <b>LASSO N=655</b> | <b>Modified Hurd N=720</b> | <b>Medicare 3-year N=640</b> |
|                                                                                                                                                                               | Prevalence Ratio (95% Confidence Interval) |                            |                    |                       |                    |                    |                                                                                                  |                    |                            |                              |
| Age (per 10 years)                                                                                                                                                            | 1.83 (1.45, 2.30)                          | 1.08 (0.84, 1.38)          | 1.42 (1.14, 1.78)  | 1.62 (1.31, 2.00)     | 1.76 (1.37, 2.27)  | 1.71 (1.35, 2.19)  | 2.20 (1.79, 2.70)                                                                                | 1.74 (1.39, 2.19)  | 2.28 (1.78, 2.93)          | 1.80 (1.29, 2.52)            |
| Female                                                                                                                                                                        | 1.18 (0.82, 1.68)                          | 1.39 (0.89, 2.18)          | 1.01 (0.75, 1.36)  | 0.94 (0.70, 1.24)     | 1.17 (0.85, 1.62)  | 1.50 (1.07, 2.10)  | 1.15 (0.88, 1.51)                                                                                | 1.21 (0.90, 1.63)  | 1.02 (0.76, 1.37)          | 1.21 (0.72, 2.03)            |
| Less than HS                                                                                                                                                                  | 0.98 (0.71, 1.35)                          | 0.76 (0.54, 1.08)          | 1.18 (0.87, 1.59)  | 0.90 (0.67, 1.20)     | 0.80 (0.59, 1.09)  | 1.36 (1.03, 1.80)  | 1.00 (0.76, 1.31)                                                                                | 1.03 (0.78, 1.35)  | 0.83 (0.63, 1.09)          | 0.61 (0.39, 0.93)            |
| Black                                                                                                                                                                         | 1.47 (1.04, 2.09)                          | 2.41 (1.60, 3.63)          | 2.49 (1.80, 3.44)  | 1.80 (1.28, 2.54)     | 2.20 (1.56, 3.10)  | 1.61 (1.18, 2.20)  | 1.33 (1.00, 1.79)                                                                                | 1.39 (1.06, 1.83)  | 1.72 (1.29, 2.28)          | 1.41 (0.84, 2.38)            |
| Diabetes                                                                                                                                                                      | 0.97 (0.63, 1.49)                          | 0.43 (0.23, 0.79)          | 1.00 (0.65, 1.56)  | 0.85 (0.54, 1.34)     | 0.79 (0.53, 1.18)  | 0.83 (0.60, 1.16)  | 0.92 (0.66, 1.28)                                                                                | 0.80 (0.58, 1.12)  | 0.99 (0.68, 1.43)          | 0.44 (0.23, 0.82)            |
| Any IADL Limitation                                                                                                                                                           | 3.96 (2.50, 6.29)                          | 22.05 (10.43, 46.62)       | 5.94 (3.88, 9.11)  | 7.43 (3.90, 14.14)    | 8.82 (5.21, 14.92) | 6.45 (4.01, 10.39) | 2.95 (1.98, 4.39)                                                                                | 2.47 (1.52, 4.02)  | 3.79 (2.53, 5.69)          | 3.63 (1.86, 7.07)            |

Abbreviations: CI, Confidence Interval; FFS, fee-for-service; HS, high school; IADL, instrumental activities of daily living  
All estimates are weighted using Wave A ADAMS sampling weights, and mutually adjusted for all other characteristics listed in the table as well as HRS proxy versus self-respondent status.

**Supplemental Table 6. Sensitivity analyses for dementia prevalence by ascertainment strategy and participant characteristics considering alternate look-back periods for Medicare-based dementia ascertainment**

|                     | <b>In-Person Evaluation<br/>(Common Sample)</b> | <b>Medicare Subset, (Any FFS Medicare)</b> |                               |                               | <b>Medicare Subset (No<br/>HMO Medicare)</b> |
|---------------------|-------------------------------------------------|--------------------------------------------|-------------------------------|-------------------------------|----------------------------------------------|
|                     | <b>ADAMS, n=608</b>                             | <b>Medicare 1-year, n=510</b>              | <b>Medicare 3-year, n=517</b> | <b>Medicare 5-year, n=529</b> | <b>Medicare 3-year, n=460</b>                |
| Overall             | 11.8% (9.5%, 14.5%)                             | 5.8% (4.3%, 7.6%)                          | 7.9% (6.0%, 10.3%)            | 8.3% (6.4%, 10.8%)            | 7.9% (5.9%, 10.6%)                           |
| Age                 |                                                 |                                            |                               |                               |                                              |
| Under Age 80 (ref)  | 5.7% (3.6%, 9.0%)                               | 2.1% (1.1%, 3.9%)                          | 3.3% (1.8%, 5.7%)             | 3.3% (1.9%, 5.6%)             | 3.1% (1.6%, 5.8%)                            |
| Age 80 and over     | 22.9% (18.2%, 28.4%)                            | 11.8% (8.6%, 16.1%)                        | 15.6% (11.5%, 20.8%)          | 16.7% (12.4%, 22.1%)          | 15.5% (11.1%, 21.1%)                         |
| PR (95%CI)          | 3.99 (2.41, 6.60)                               | 5.58 (2.81, 11.10)                         | 4.81 (2.52, 9.17)             | 5.15 (2.76, 9.64)             | 5.02 (2.47, 10.20)                           |
| Gender              |                                                 |                                            |                               |                               |                                              |
| Male (ref)          | 9.9% (7.0%, 13.8%)                              | 4.6% (2.8%, 7.5%)                          | 6.5% (3.8%, 10.9%)            | 7.6% (4.6%, 12.2%)            | 6.3% (3.5%, 11.0%)                           |
| Female              | 13.0% (9.8%, 17.0%)                             | 6.5% (4.6%, 9.1%)                          | 8.7% (6.4%, 12.0%)            | 8.8% (6.4%, 11.9%)            | 9.00% (6.3%, 12.6%)                          |
| PR (95% CI)         | 1.31 (0.85, 2.03)                               | 1.40 (0.77, 2.56)                          | 1.35 (0.73, 2.50)             | 1.16 (0.65, 2.07)             | 1.42 (0.73, 2.76)                            |
| Education           |                                                 |                                            |                               |                               |                                              |
| <HS (ref)           | 9.4% (7.0%, 12.4%)                              | 5.9% (4.2%, 8.4%)                          | 8.0% (5.6%, 11.2%)            | 8.00% (5.7%, 11.1%)           | 7.8% (5.3%, 11.3%)                           |
| HS or greater       | 17.5% (12.7%, 23.5%)                            | 5.4% (3.4%, 8.3%)                          | 7.7% (5.1%, 11.5%)            | 9.1% (6.00%, 13.5%)           | 8.2% (5.4%, 12.4%)                           |
| PR (95% CI)         | 1.87 (1.22, 2.85)                               | 0.90 (0.52, 1.58)                          | 0.97 (0.57, 1.64)             | 1.13 (0.67, 1.93)             | 1.05 (0.60, 1.84)                            |
| Race                |                                                 |                                            |                               |                               |                                              |
| White (ref)         | 11.1% (8.8%, 14.0%)                             | 5.6% (4.2%, 7.6%)                          | 7.8% (5.8%, 10.4%)            | 8.2% (6.1%, 10.8%)            | 7.7% (5.6%, 10.6%)                           |
| Black               | 19.3% (12.8%, 28.1%)                            | 7.4% (4.0%, 13.2%)                         | 9.7% (5.7%, 15.8%)            | 10.2% (6.2%, 16.4%)           | 10.6% (6.2%, 17.5%)                          |
| PR (95% CI)         | 1.74 (1.10, 2.74)                               | 1.31 (0.68, 2.54)                          | 1.24 (0.70, 2.23)             | 1.25 (0.71, 2.20)             | 1.38 (0.75, 2.52)                            |
| Diabetes            |                                                 |                                            |                               |                               |                                              |
| No (ref)            | 12.0% (9.6%, 15.0%)                             | 6.3% (4.7%, 8.5%)                          | 8.7% (6.5%, 11.6%)            | 9.2% (6.9%, 12.1%)            | 8.7% (6.3%, 11.9%)                           |
| Yes                 | 10.5% (5.5%, 19.2%)                             | 3.0% (1.5%, 6.0%)                          | 3.9% (2.1%, 7.1%)             | 3.9% (2.1%, 7.1%)             | 4.1% (2.1%, 7.7%)                            |
| PR (95% CI)         | 0.87 (0.45, 1.70)                               | 0.48 (0.22, 1.01)                          | 0.44 (0.22, 0.87)             | 0.42 (0.22, 0.82)             | 0.47 (0.23, 0.96)                            |
| Any IADL Limitation |                                                 |                                            |                               |                               |                                              |
| No (ref)            | 5.0% (3.3%, 7.4%)                               | 2.1% (1.1%, 4.0%)                          | 3.7% (2.0%, 6.5%)             | 4.0% (2.3%, 6.9%)             | 3.7% (2.0%, 6.9%)                            |
| Yes                 | 38.6% (30.0%, 47.9%)                            | 18.7% (13.7%, 25.2%)                       | 22.7% (16.9%, 29.9%)          | 23.7% (17.7%, 30.8%)          | 22.1% (16.2%, 29.6%)                         |
| PR (95% CI)         | 7.72 (4.87, 12.24)                              | 9.00 (4.35, 18.60)                         | 6.23 (3.27, 11.86)            | 5.89 (3.20, 10.85)            | 5.93 (2.96, 11.90)                           |

Abbreviations: CI, Confidence Interval; PR, Prevalence Ratio

All estimates are weighted using Wave A ADAMS sampling weights.

| <b>Supplemental Table 7. Sensitivity analyses for adjusted associations considering alternate look-back periods for Medicare-based dementia ascertainment</b>                               |                                             |                                            |                               |                               |                                          |
|---------------------------------------------------------------------------------------------------------------------------------------------------------------------------------------------|---------------------------------------------|--------------------------------------------|-------------------------------|-------------------------------|------------------------------------------|
|                                                                                                                                                                                             | <b>In-Person Evaluation (Common Sample)</b> | <b>Medicare Subset, (Any FFS Medicare)</b> |                               |                               | <b>Medicare Subset (No HMO Medicare)</b> |
|                                                                                                                                                                                             | <b>ADAMS, n=608</b>                         | <b>Medicare 1-year, n=510</b>              | <b>Medicare 3-year, n=517</b> | <b>Medicare 5-year, n=529</b> | <b>Medicare 3-year, n=460</b>            |
|                                                                                                                                                                                             | Prevalence Ratio (95% Confidence Interval)  |                                            |                               |                               |                                          |
| Age (per 10 years)                                                                                                                                                                          | 1.85 (1.38, 2.48)                           | 2.09 (1.25, 3.48)                          | 2.10 (1.41, 3.14)             | 2.20 (1.49, 3.26)             | 2.24 (1.46, 3.42)                        |
| Female                                                                                                                                                                                      | 1.11 (0.73, 1.69)                           | 1.21 (0.64, 2.29)                          | 1.17 (0.61, 2.22)             | 1.01 (0.56, 1.83)             | 1.23 (0.62, 2.47)                        |
| Less than HS                                                                                                                                                                                | 0.96 (0.67, 1.39)                           | 0.40 (0.23, 0.71)                          | 0.49 (0.29, 0.81)             | 0.57 (0.34, 0.98)             | 0.47 (0.28, 0.79)                        |
| Black                                                                                                                                                                                       | 1.45 (0.99, 2.11)                           | 1.50 (0.86, 2.62)                          | 1.35 (0.81, 2.26)             | 1.29 (0.76, 2.18)             | 1.44 (0.84, 2.46)                        |
| Diabetes                                                                                                                                                                                    | 0.99 (0.6, 1.64)                            | 0.59 (0.28, 1.26)                          | 0.54 (0.27, 1.05)             | 0.51 (0.27, 0.99)             | 0.56 (0.28, 1.12)                        |
| Any IADL Limitation                                                                                                                                                                         | 3.09 (1.81, 5.27)                           | 3.41 (1.27, 9.14)                          | 2.59 (1.19, 5.61)             | 2.36 (1.11, 5.01)             | 2.30 (1.06, 5.01)                        |
| Abbreviations: CI, Confidence Interval; FFS, fee-for-service; HMO, health maintenance organization; HS, high school; IADL, instrumental activities of daily living                          |                                             |                                            |                               |                               |                                          |
| All estimates are weighted using Wave A ADAMS sampling weights, and mutually adjusted for all other characteristics listed in the table as well as HRS proxy versus self-respondent status. |                                             |                                            |                               |                               |                                          |
